# Supplementary material
Source: PubMed Central journal article supplement (PMC7322958)
Supplement: advancesADV2020001719-suppl1.pdf [file advancesADV2020001719-suppl1.pdf]

## Supplemental Material

**Supplemental table 1: Comparison of overall survival for patients age  $\geq 50$  years with and without GA assessment data at participating sites.**

| Outcomes         | Population without GA assessment<br>(N = 2491) |                      | Population with GA assessment<br>(N = 330) |                      | p-value |
|------------------|------------------------------------------------|----------------------|--------------------------------------------|----------------------|---------|
|                  | N Eval                                         | Probability (95% CI) | N Eval                                     | Probability (95% CI) |         |
| Overall survival | 2466                                           |                      | 330                                        |                      | 0.75    |
| 1 year           |                                                | 63 (61-65)%          |                                            | 62 (56-67)%          |         |
| 2 years          |                                                | 51 (49-53)%          |                                            | 51 (45-57)%          |         |

Abbreviations: N Eval, number evaluable; GA, geriatric assessment; CI, confidence interval.

**Supplemental Table 2: Causes of death by BOMC score.**

| Cause of death            | BOMC <7<br>(n=87) | BOMC $\geq 7$<br>(n=22) | Total<br>(n=109) |
|---------------------------|-------------------|-------------------------|------------------|
| Primary disease, N(%)     | 46 (53)           | 7 (32)                  | 53 (49)          |
| Non-disease related, N(%) | 40 (46)           | 14 (64)                 | 54 (50)          |
| Graft failure             | 2 (2)             | 0                       | 2 (2)            |
| Graft versus host disease | 14 (16)           | 4 (18)                  | 18 (17)          |
| Infection                 | 13 (15)           | 4 (18)                  | 17 (16)          |
| Organ failure             | 8 (9)             | 3 (14)                  | 11 (10)          |
| Other non-disease related | 3 (3)             | 3 (14)                  | 6 (6)            |
| Unknown, N(%)             | 1 (1)             | 1 (5)                   | 2 (2)            |

Abbreviations: BOMC, Blessed Orientation Memory Concentration.
